# Supplementary material
Source: publisher figshare collection journal article supplement (https://tandf.figshare.com/ndownloader/files/36574070)
Supplement: Supplementary file 1 [file 36574070]

Appendix 1. **2015–2016**

| **Case nr:** | **Wheeled Mobile devices** | **Gender: Male/ Female** | **Who reported (the person, parent, proxy)** | **Underage** Yes/No | **Place where the activity occurred** | **Establishment where the activity occurred** | **Used the DO form**  Yes/No |
| --- | --- | --- | --- | --- | --- | --- | --- |
| 1 | Wheelchair | Male | The person | No | Big municipality | Public transport (bus) | Yes |
| 2 | Rollator | Male | The person | No | Small municipality | Public place (indoor) mall | No |
| 3 | Wheelchair | Male | The person | No | Big city | Public places  (indoor) opera | Yes |
| 4 | Wheelchair | Male | The person | No | Small municipality | Public transport | No |
| 5 | Wheelchair | Male | The person | No | Big city | Public transport (bus and train) | Yes |
| 6 | Wheelchair | Male | the person | No | Small municipality close to big city | Public place  (indoor) pool | Yes |
| 7 | Rollator | female | The person | No | Small municipality | Public transport  (indoor) information office | No |
| 8 | Wheelchair | Female | The person | No | Big municipality | Public transport (indoor/outdoor) entrance due to snow | no |
| 9 | Wheelchair | Male | The person | No | Big city | Public transport (space in the bus) | No |
| 10 | Wheelchair | Male and female | The parent | Yes | Small municipality | public place  (indoor) | Yes |
| 11 | Wheelchair | - | The parent | Yes | Small municipality close to big city | Public place  (indoor) gym hall | No |
| 12 | Wheelchair | Male | The person | No | Big city | Public place (indoor) elevator | Yes |
| 13 | Wheelchair | Male | The person | No | Small municipality | Public place (outdoor/entrance) due to snow | No |
| 14 | Wheelchair | Male | The person | No | Small municipality | Public place outdoor | No |
| 15 | Powered wheelchair | male | The person | no | Middle size city | Public place (indoor) bank office | Yes |
| 16 | Wheelchair | female | Proxy | No | Middle size city | Public place (indoor) healthcare center | No |
| 17 | Wheelchair | Male | The parent | Yes | Small municipality | Public place (indoor) no ramp | Yes |
| 18 | Wheelchair | Male | The parent | Yes | Small municipality | Public place (indoor) no ramp | Yes |
| 19 | Rollator | Male | The person | No | Small municipality | Public transport | No |
| 20 | Wheelchair | Female | Proxy | No | Middle size city | Public place indoor | Yes |
| 21 | Wheelchair | Male | The parent | Yes | Small municipality | Public place indoor/outdoor | no |
| 22 | Rollator | Male | The person | No | Small municipality | Public transport bus | No |
| 23 | Wheelchair | Female | The parent | Yes | Middle size city | Public place (indoor/outdoor) school environment | no |
| 24 | Wheelchair | Female | Proxy | No | Small municipality | Public place (indoor) post office | No |
| 25 | Wheelchair | Male | The person | N o | Middle size municipality | Public place (outdoor) conference activities | No |
| 26 | Wheelchair | Female | The person | No | Big city | Public place (outdoor) amusement park | Yes |
| 27 | Wheelchair | Male | The person | No | big city | Public place (outdoor) parking | No |
| 28 | Wheelchair | Female | The person | no | small municipality | Public place (indoor) no ramp | No |
| 29 | Wheelchair | Male | proxy | No | Big city | Public place outdoor (parking place) | No |
| 30 | Wheelchair | - | Proxy | No | Small municipality close to big city | Public place indoor (stairs) | No |
| 31 | Wheelchair | - | Proxy | No | Small municipality close to big city | Public place indoor (stairs) | No |
| 32 | Wheelchair | Male | The person | No | Small municipality | Public place indoor (restaurant) | No |
| 33 | Wheelchair | male | The person | No | big city | Public place outdoor (festival) | No |
| 34 | Wheelchair | Male | The person | No | Big city | Public place (outdoor) parking | Yes |
| 35 | Wheelchair | male | the person | No | big city | public place indoor (theater) | No |
| 36 | Wheelchair | Male | the person | no | small municipality | Public transport | No |
| 37 | Powered  Wheelchair | Male | the person | No | big city | public place indoor (elevator) | No |
| 38 | Wheelchair | Female | the person | No | Big city | Public transport (bus) | Yes |
| 39 | Wheelchair | Female | The person | No | small municipality | Public place indoor (pool, facilities) | Yes |
| 40 | Rollator | Female | The relative | No | Small municipality | Public transport (bus) | No |
| 41 | Wheelchair | male | the person | no | Small municipality | public place (outdoor) gas station | No |
| 42 | Wheelchair | Male | the person | No | small municipality | Public place outdoor | Yes |
| 43 | Powered wheelchair | male | the person | No | small city | public place indoor (bank) | no |
| 44 | Wheelchair | male/female | The parents | Yes | Small municipality close to big city | Public place indoor (elevator) | No |
| 45 | Powered  Wheelchair | Male | The person | No | big city | public transport | No |
| 46 | Rollator | Male | The person | No | small municipality | Public place indoor (post office) | Yes |
| 47 | Rollator | Female | The person | No | Small municipality | Public place outdoor (parking) | Yes |
| 48 | Wheelchair | Male | The person | No | Small municipality | Public place indoor (sports club) | No |
| 49 | Wheelchair | Male | The person | No | Small municipality | Public place (indoor/outdoor) entrance | No |
| 50 | Wheelchair | Female | The person | No | Big city | Public place (sports activity) | No |
| 51 | Wheelchair | - | The person | No | Middle size municipality | Public place (outdoor) parking | Yes |
| 52 | Wheelchair | Male | The parent | Yes | Small municipality | Public place (school) | No |
| 53 | Rollator | Female | The person | No | Small municipality | Public place (indoor) | Yes |
| 54 | Wheelchair | Male | The person | No | Small municipality | Public transport (train) | Yes |
| 55 | Wheelchair | Female | The parent | Yes | - | Public place (indoor/outdoor) entrance | Yes |
| 56 | Wheelchair | Female | Proxy | No | Big city | Public place ourdoor | No |
| 57 | Rollator | Male | The person | No | Big city | Public transport (bus and train) | No |
|  | **2016** |  |  |  |  |  |  |
| 58 | Rollator | Female | The person | No | Big city | Public transport (train) | No |
| 59 | Wheelchair | Female | The person | No | Big city | Public transport (train) | No |
| 60 | Powered  wheelchair | Male | The person | No | Middle size municipality | Public place (the garage of the electric wheelchair) | No |
| 61 | Powered wheelchair | Female | The daughter | No | Middle size municipality | Public transport (train) no space | No |
| 62 | Powered wheelchair | Male | The person | No | Small municipality | Public place (restaurant) | Yes |
| 63 | Powered wheelchair | Female | The person | No | Small municipality | Private place / no home modification | No |
| 64 | Wheelchair | Female | The person | No | Big city | Public transport (train) | No |
| 65 | Wheelchair | Female | Proxy | No | Small municipality | Public place (furniture store) | No |
| 66 | Wheelchair | Female | The person | No | Middle size city | Public place (foodstore) | No |
| 67 | Wheelchair | Female | Friend | No | Big city | Public place (indoor) amusementpark | No |
| 68 | Wheelchair | Male | The person | No | Big city | Public place (indoor) no ramp | No |
| 69 | Wheelchair | Male | The person | No | Small municipality close to big city | Public space (indoor) restaurant | No |
| 70 | Wheelchair | Male | Proxy | No | Big city | Public space (indoor) restaurant | No |
| 71 | Wheelchair | Male | The person | No | Big city | Private space/working place | No |
| 72 | Wheelchair | Female | The parent | Yes | Middle size city | Public space (indoor/outdoor) school environment | Yes |
| 73 | Wheelchair | Female | The person | No | Middle size city | Public space (indoor) hotel | No |
| 74 | Wheelchair | Female | The parent | Yes | Big city | Public space (outdoor/indoor) school environment | No |
| 75 | Wheelchair | Female | The person | No | Middle size municipality | Public space (indoor) | Yes |
| 76 | Wheelchair | Female | The person | No | Big city | Public transport (bus) | Yes |
| 77 | Rollator | Female | The person | No | Big city | Public space (indoor) museum | No |
| 78 | Wheelchair | Female | The person | No | - | Public space (indoor) food store | No |
| 79 | Wheelchair | Male | The person | No | Big city | Public space outdoor) parking spot | Yes |
| 80 | Wheelchair | Male | The person | No | Small municipality | Private space (no home modification) | Yes |
| 81 | Rollator | Male | The person | No | Small municipality | Public transport (bus) | No |
| 82 | Wheelchair | Female | The person | No | Big city | Public transport (train) no ramp | No |
| 83 | Wheelchair | Female | The person | No | Big city | Public space (indoor) restaurant | No |
| 84 | Wheelchair | Male | The person | No | Big city | Public transport (train) | No |
| 85 | Wheelchair | Female | The person | No | Big city | Public transport (train) | Yes |
| 86 | Wheelchair | Female | The person | No | Big city | Public space (parking place) | Yes |
| 87 | Wheelchair | Female | The person | No | Big city | Public space outdoor) no ramp | No |
| 88 | Wheelchair | Male | The person | No | Middle size municipality | Public space (indoor) post office | No |
